# Supplementary material for: Hypotensive Effects and Angiotensin-Converting Enzyme Inhibitory Peptides of Reishi (Ganoderma lingzhi) Auto-Digested Extract
Source: PubMed Central journal article supplement (PMC6271714; doi:10.3390/molecules190913473), 2014-08-29
Supplement: molecules-19-13473-s001.pdf [file molecules-19-13473-s001.pdf]

## Supplementary Materials

**Figure S1.** Time-course of changes (mean  $\pm$  SE,  $n = 6$ ) in DBP of SHR after administering HWR and ADR extracts. Single oral administration was dosed at 500 and 1500 mg/kg body weight. Ultrapure water was used as the control (20 mL/kg body weight).

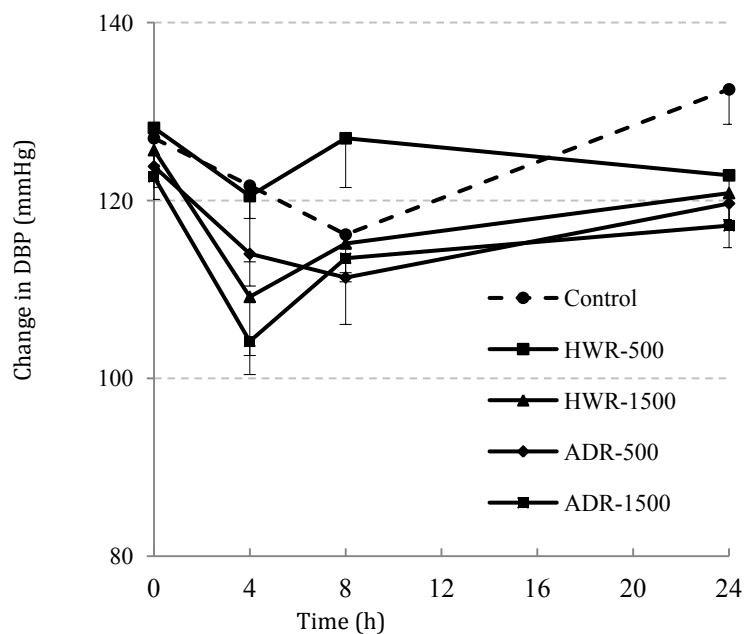

**Figure S2.** Ninhydrin staining of peptides and/or amino acid in the  $\leq 3$  kDa fraction of ADR extract.

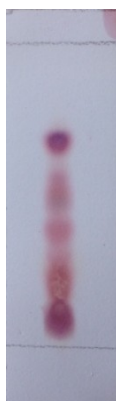

Reishi's auto-digestion extract was spotted onto silica-gel plate (TLC Plate Silica Gel 60 F254, Merck, Darmstadt, Germany); the plate was eluted with *n*-butanol:acetic acid:water 3:1:1 (by volume) mixture followed by ninhydrin stain (Wako Pure Chemical, Osaka, Japan)

**Figure S3.** Preparative HPLC chromatogram of the  $\leq 3$  kDa fraction. Elution was performed with a linear gradient from 10% to 60% of B for 60 minutes at a flow rate of 5 mL/min.

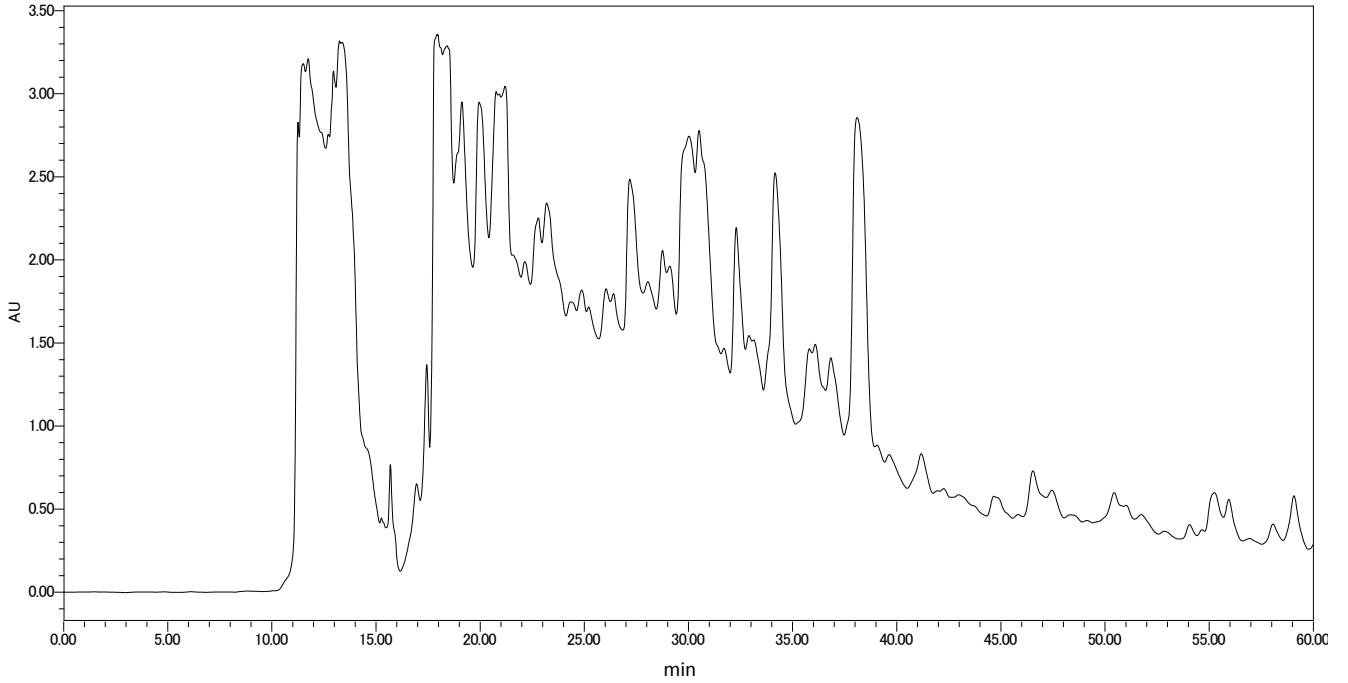

**Figure S4.** Mass spectra of identified peptide-candidates and corresponding standards.

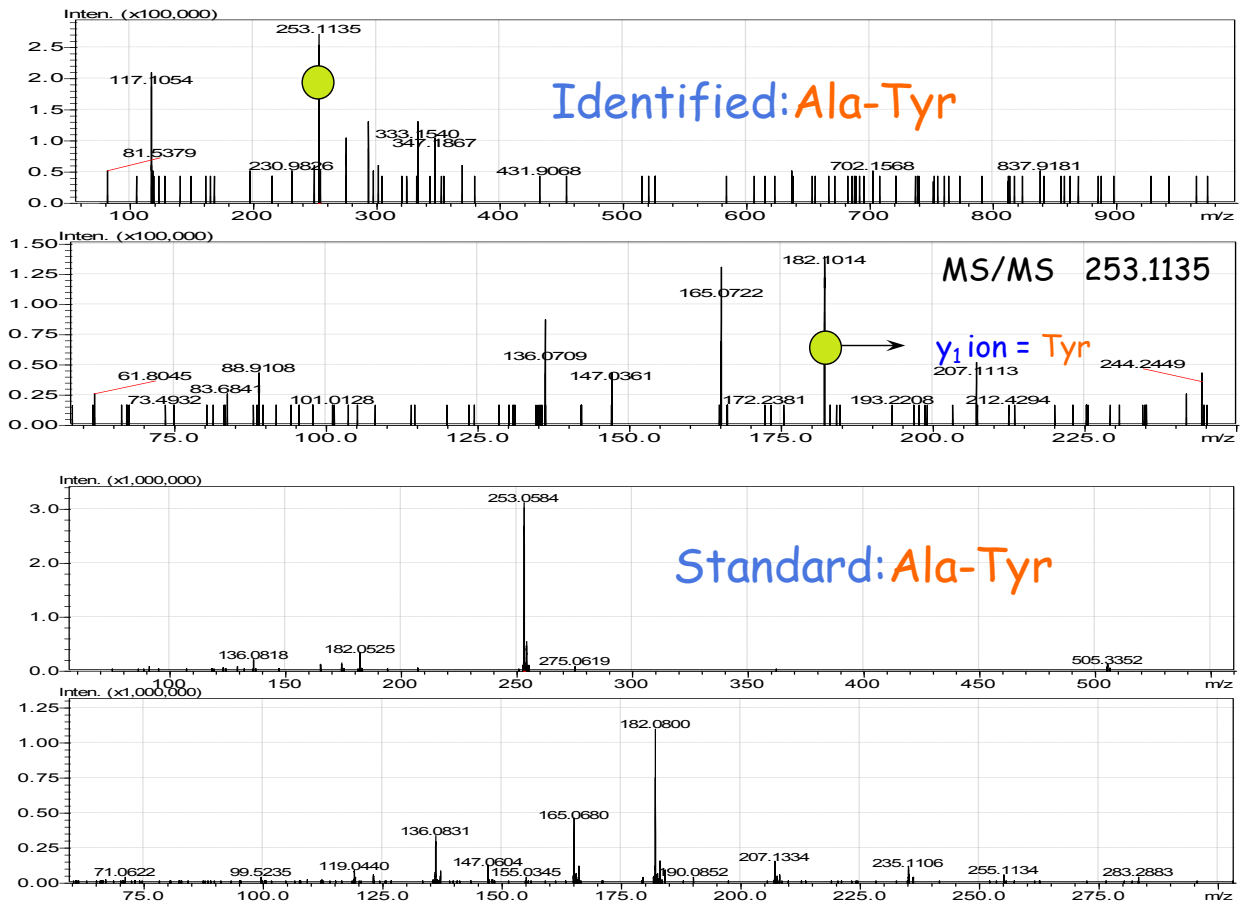

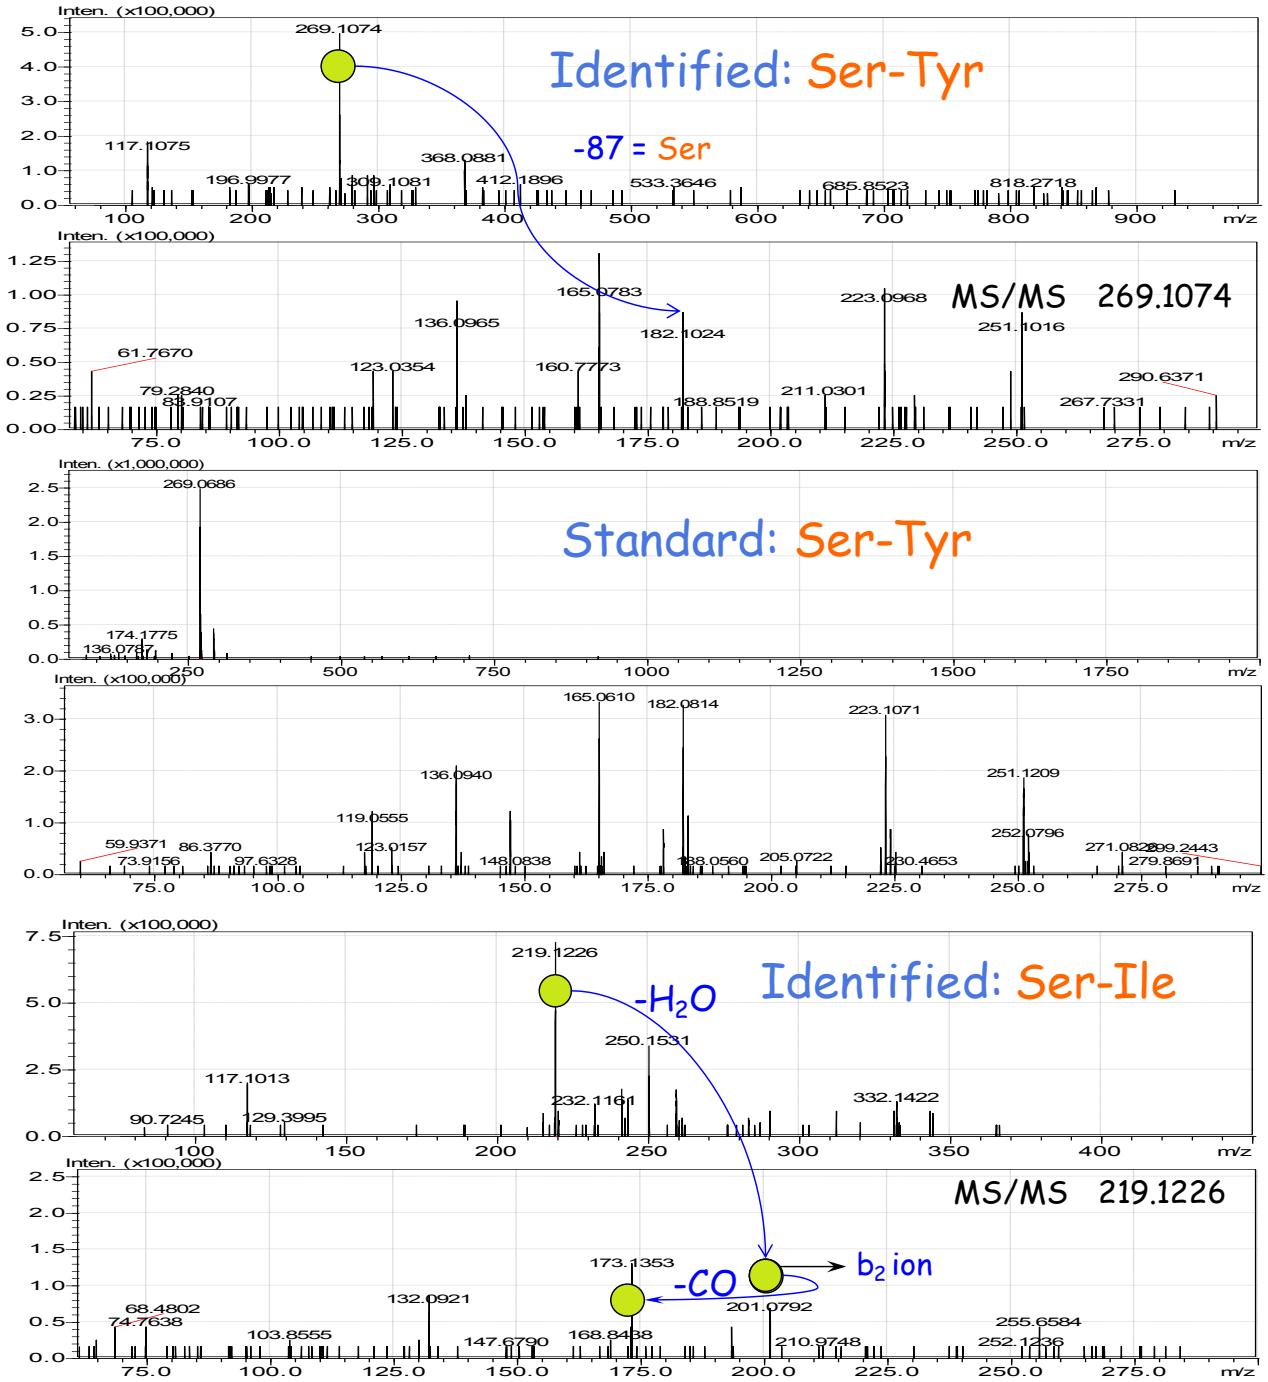

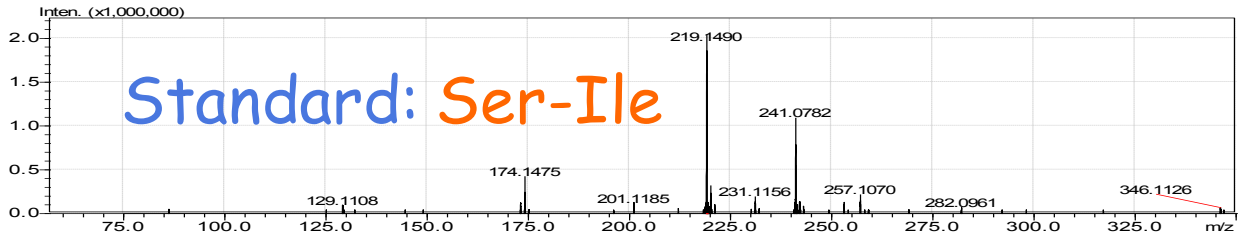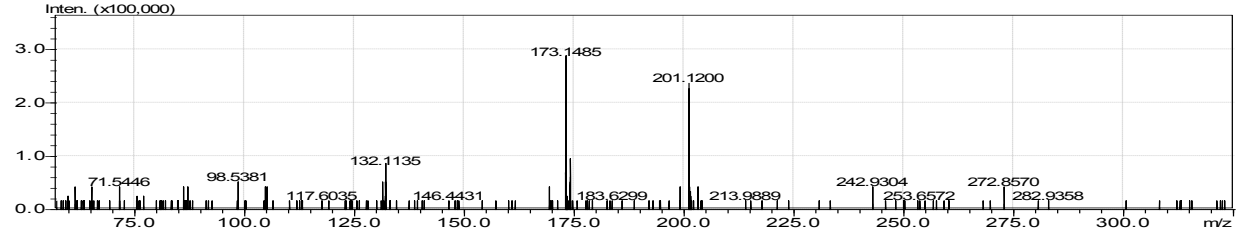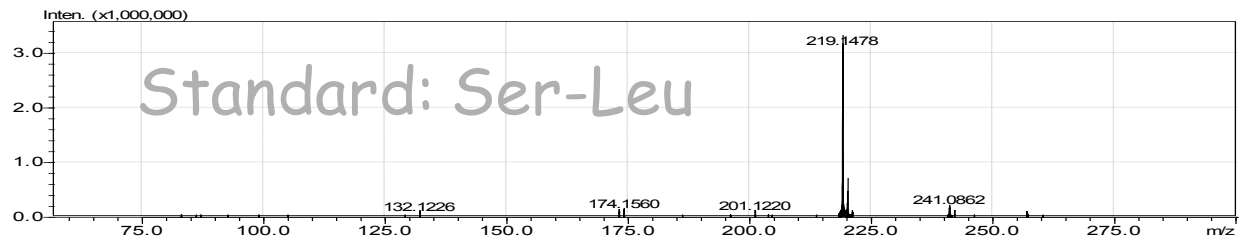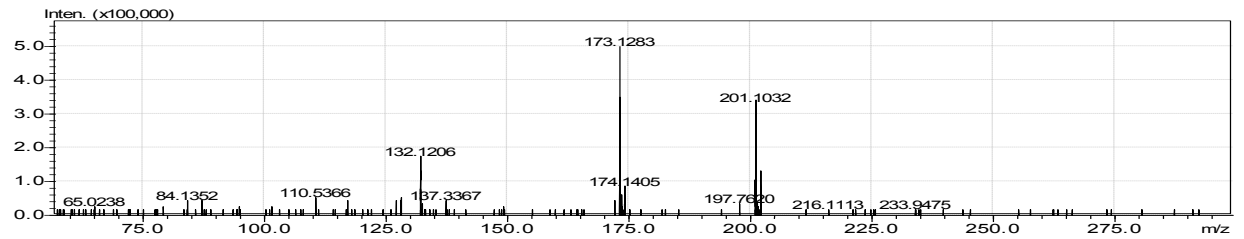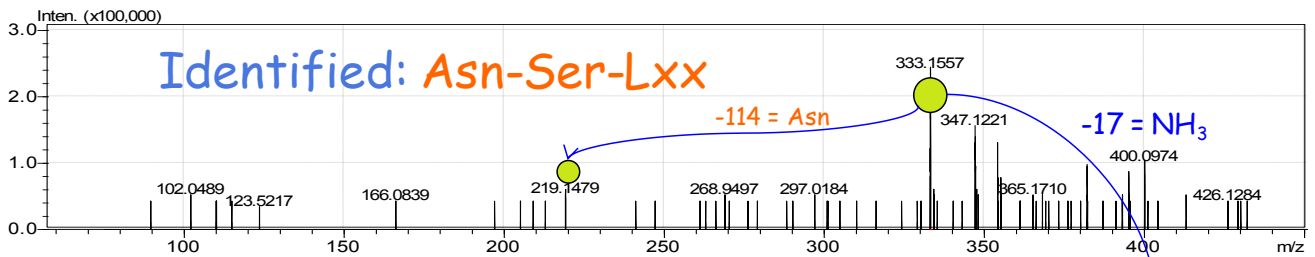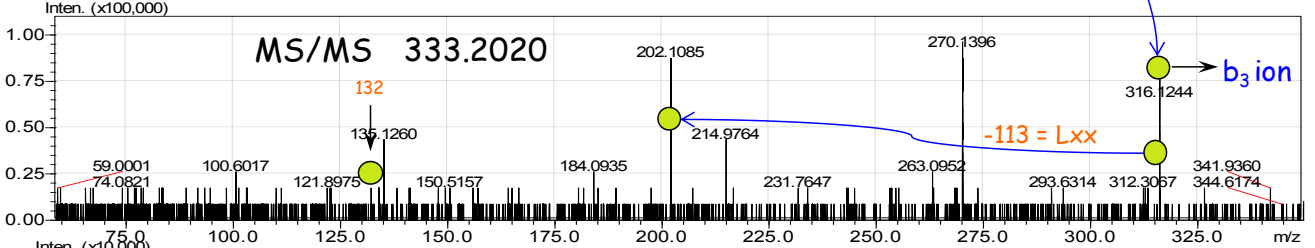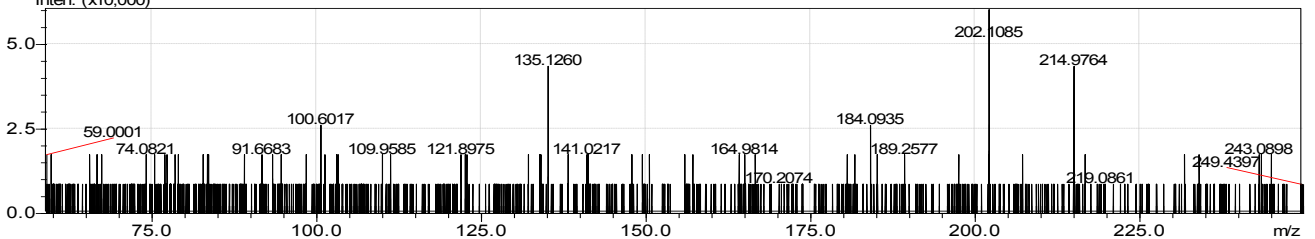

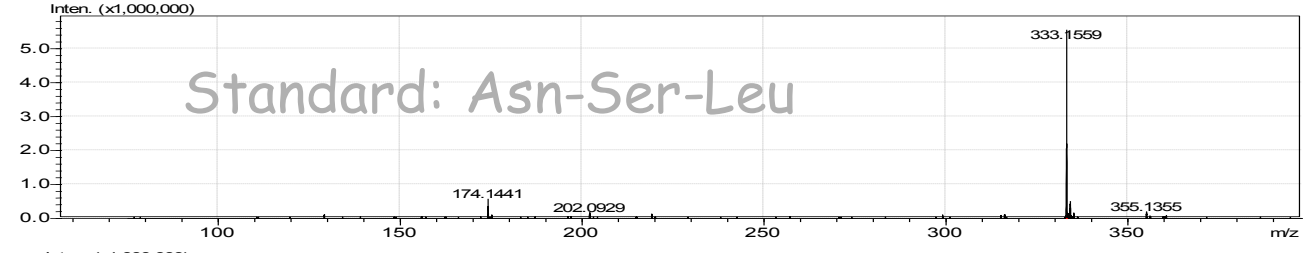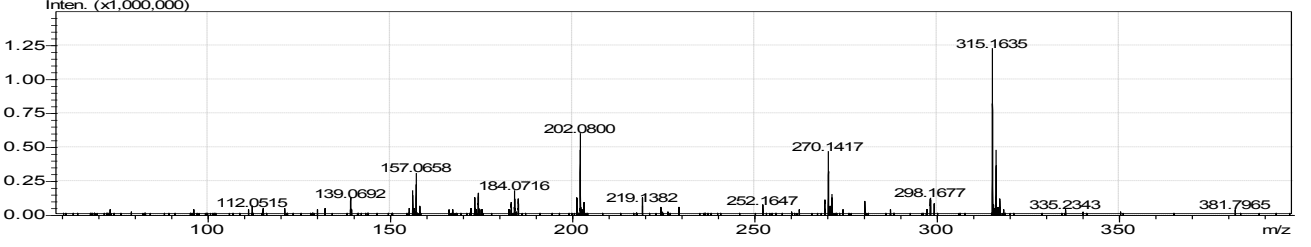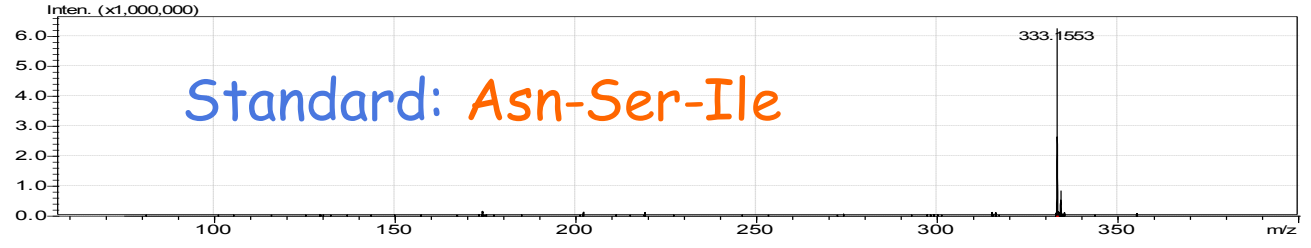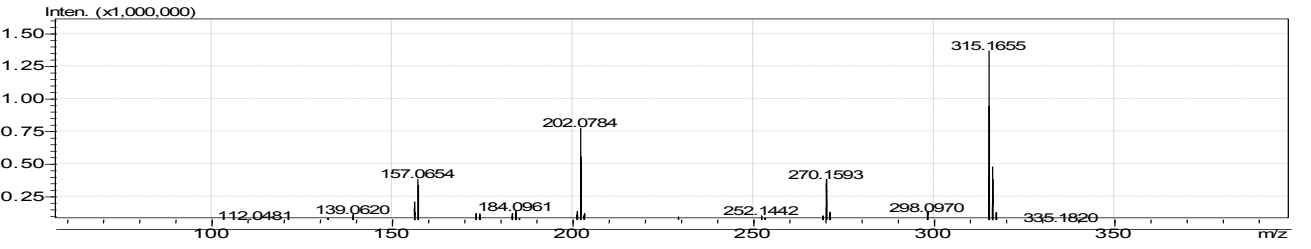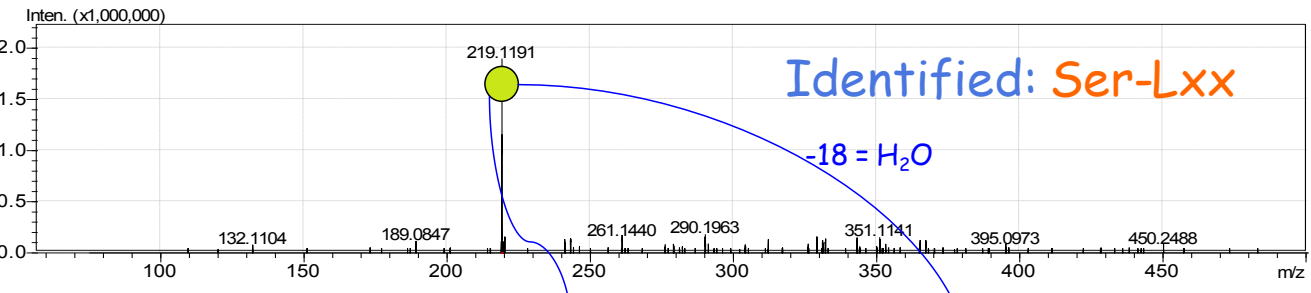

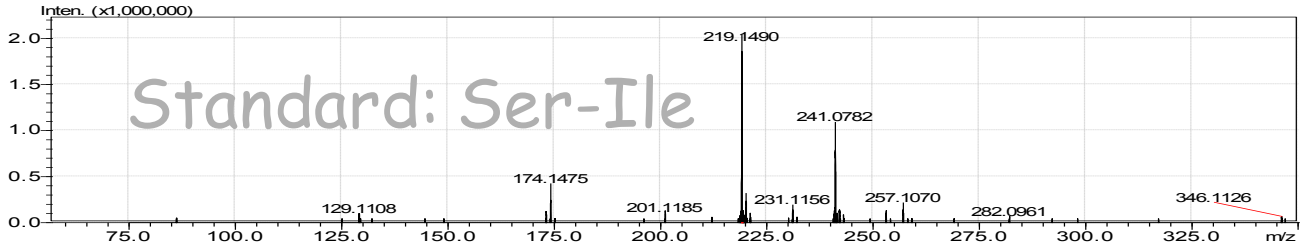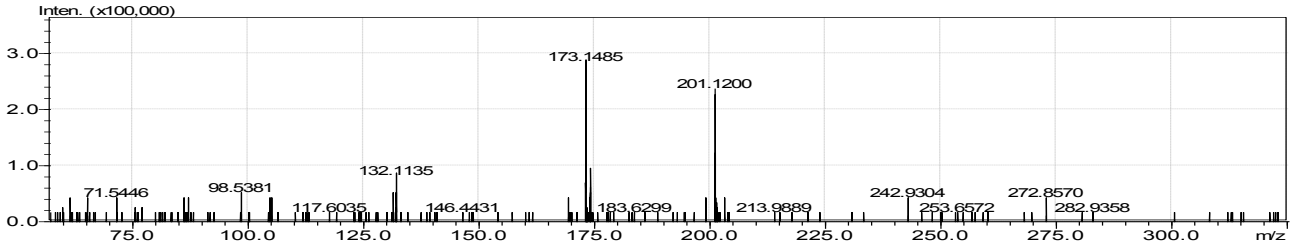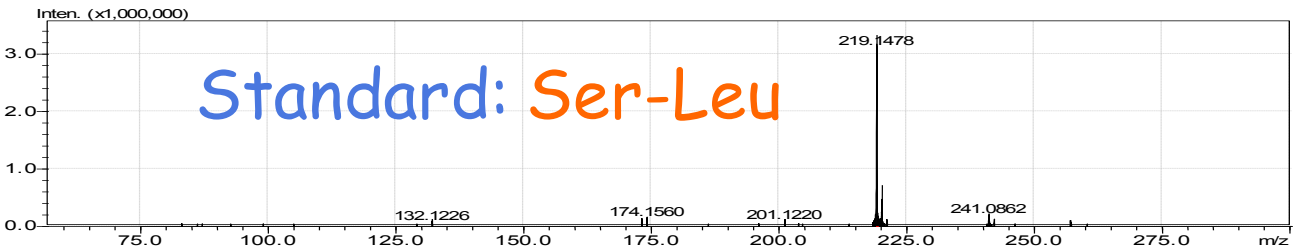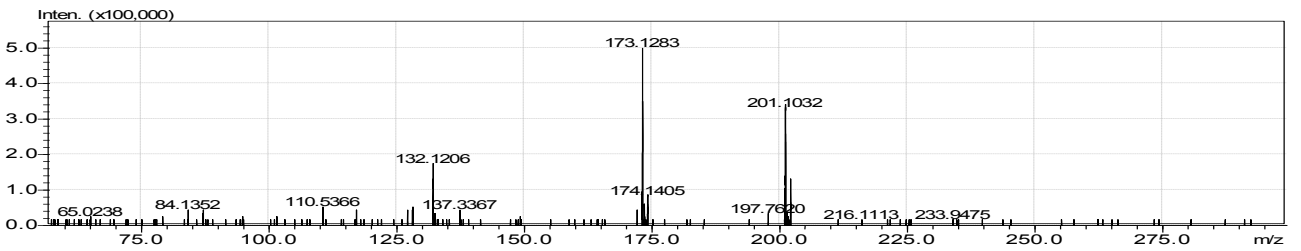

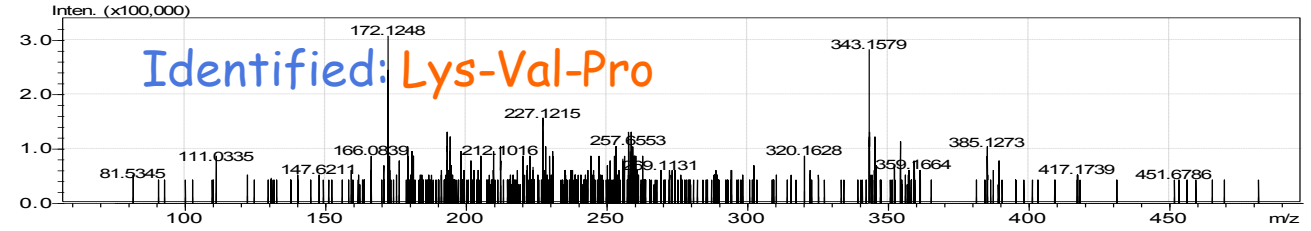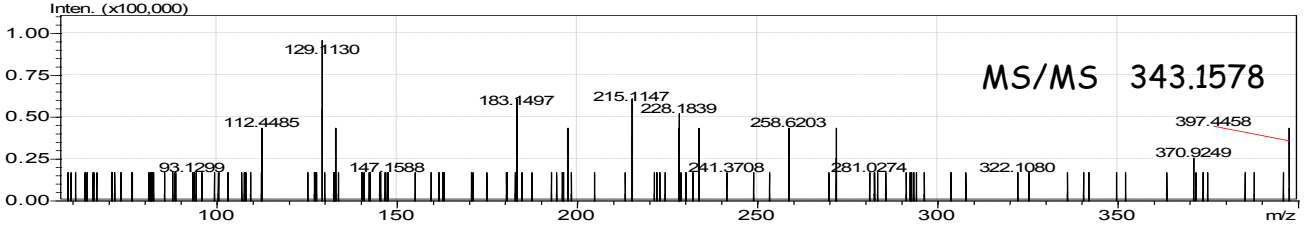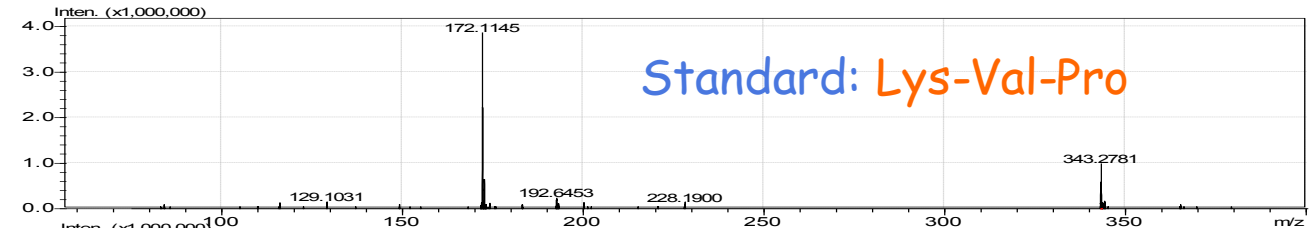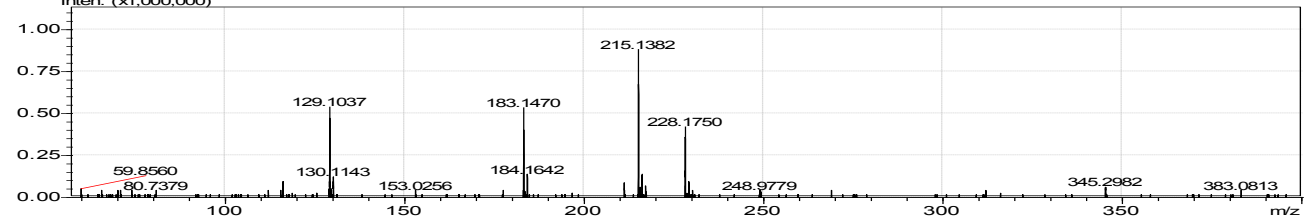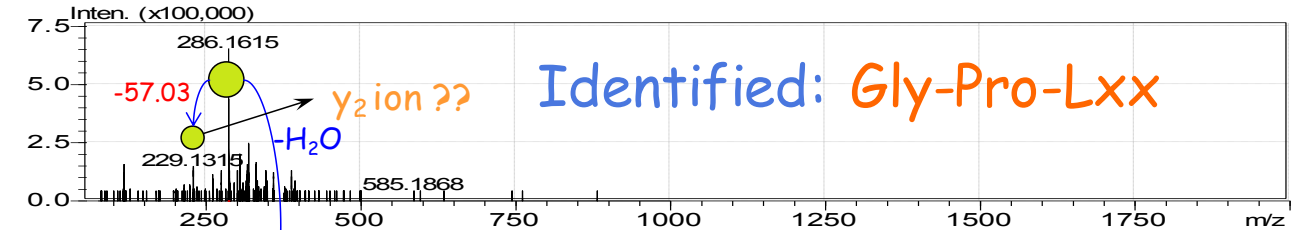

MS/MS 219.1266

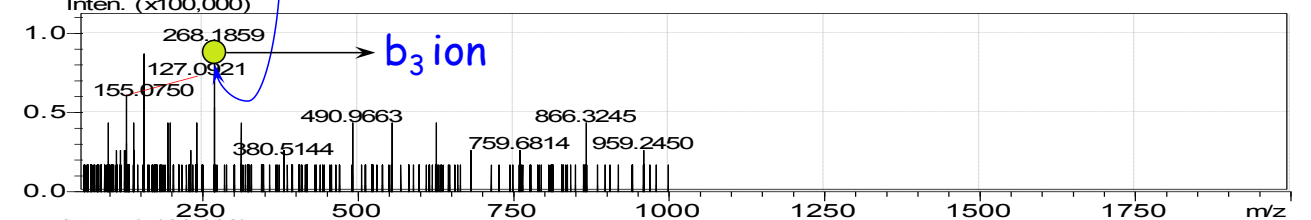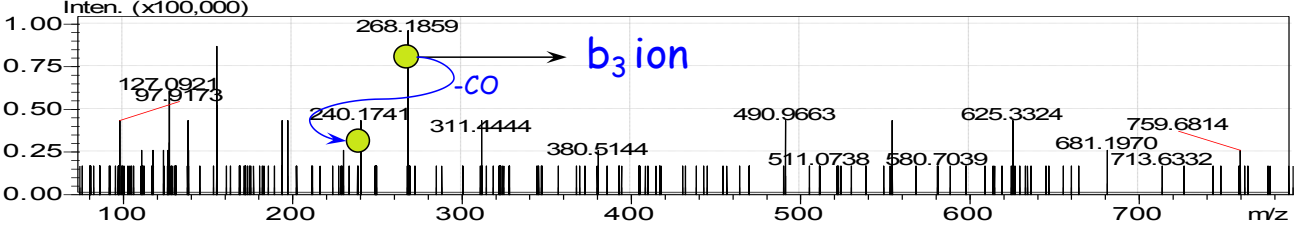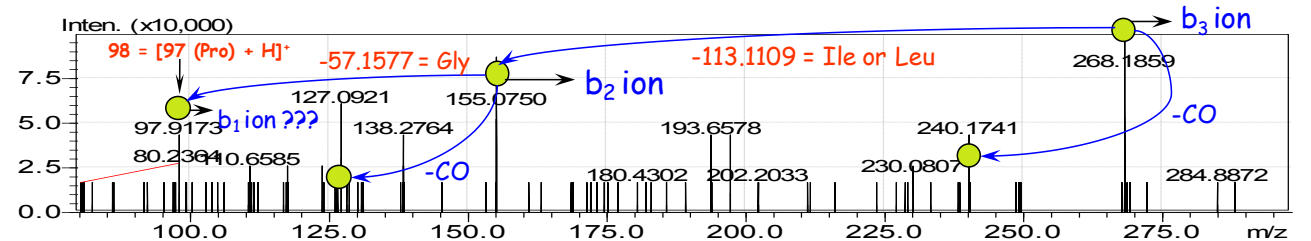

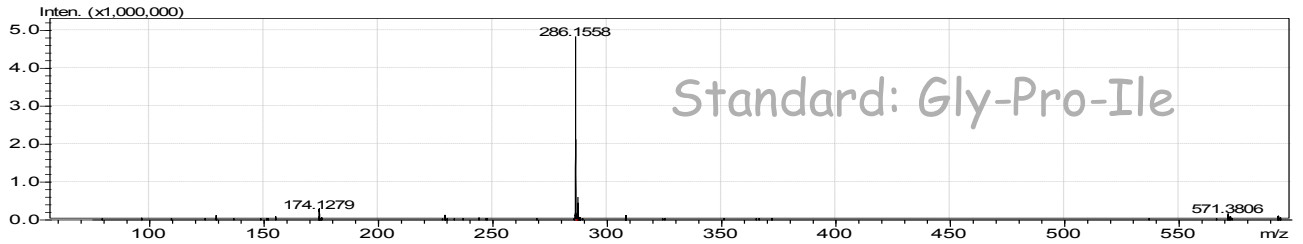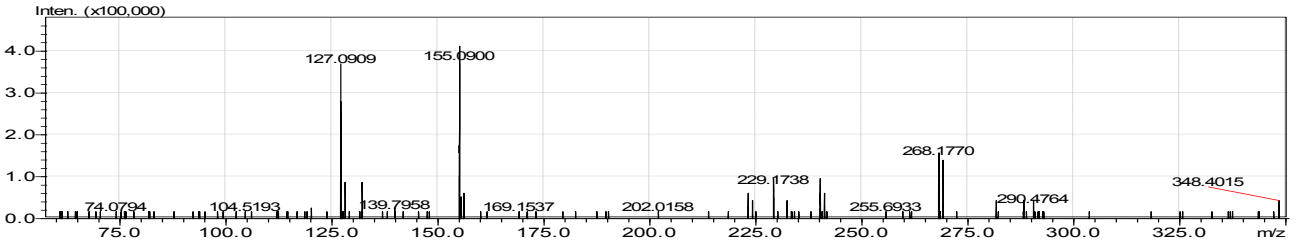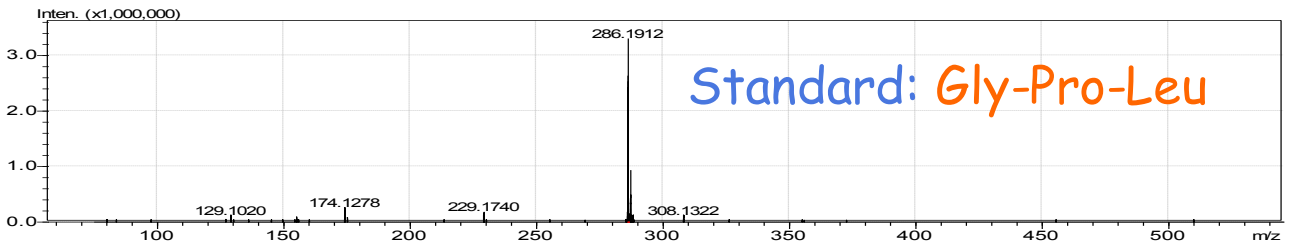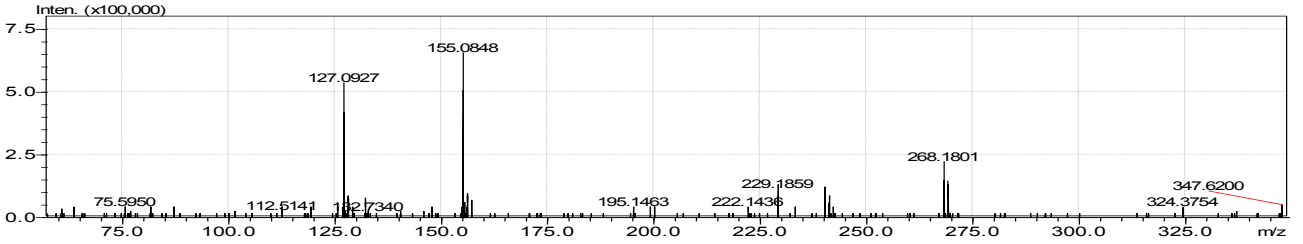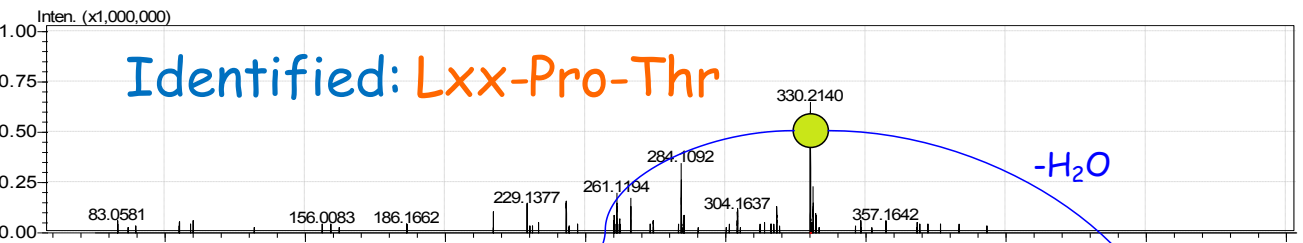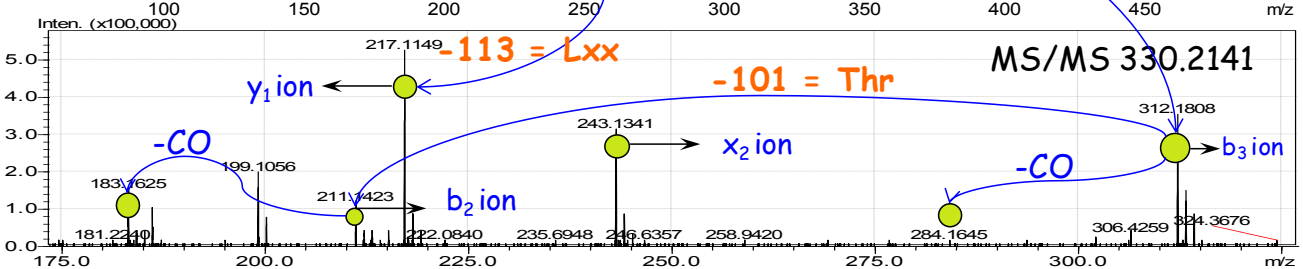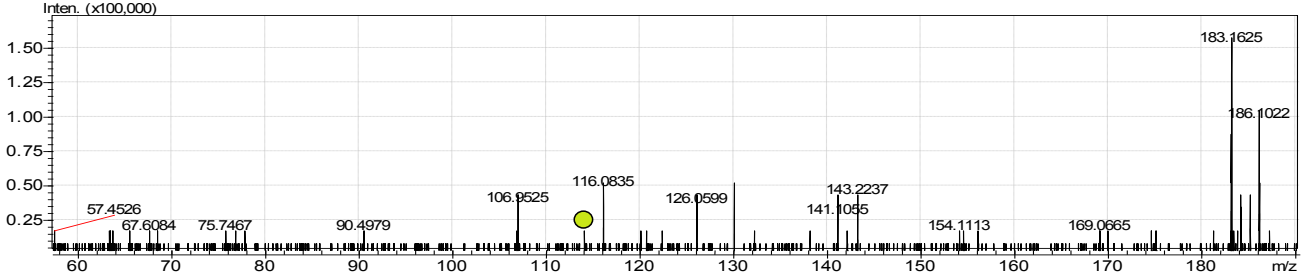



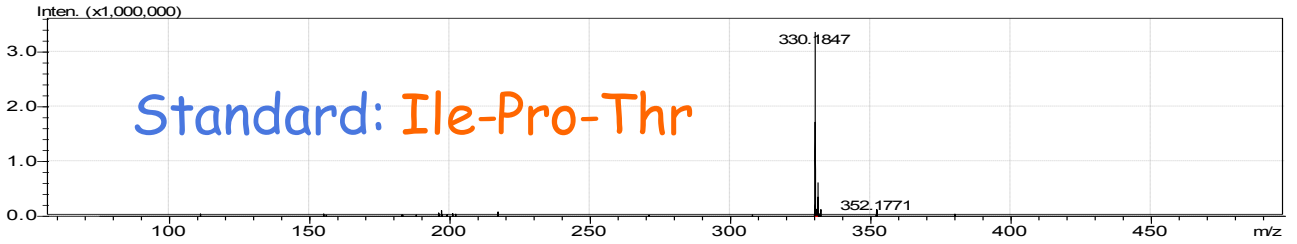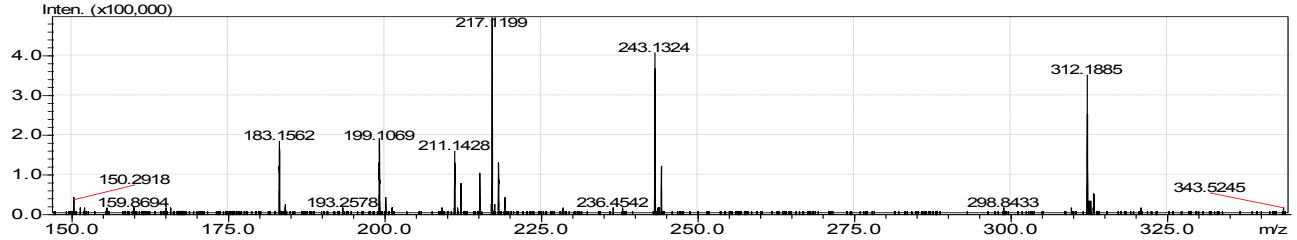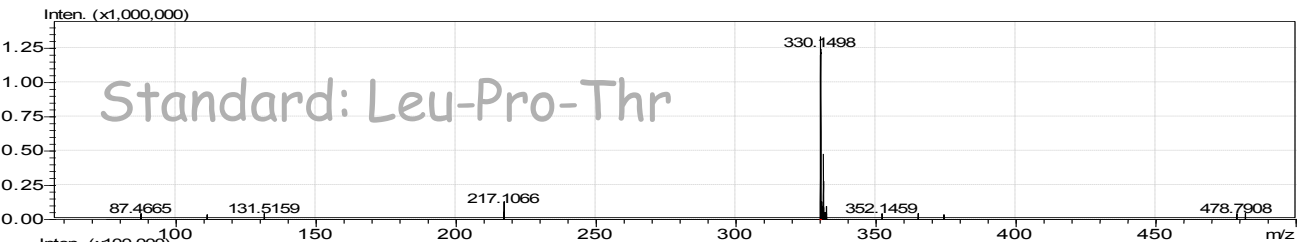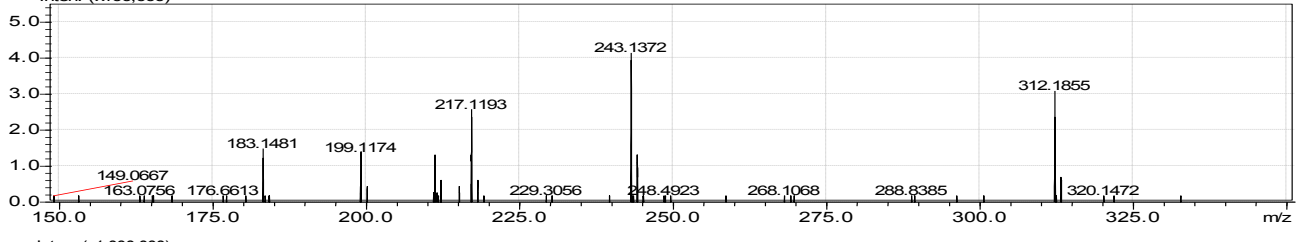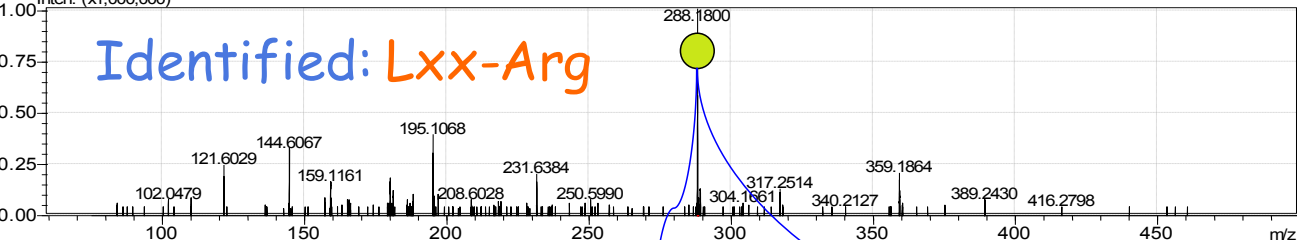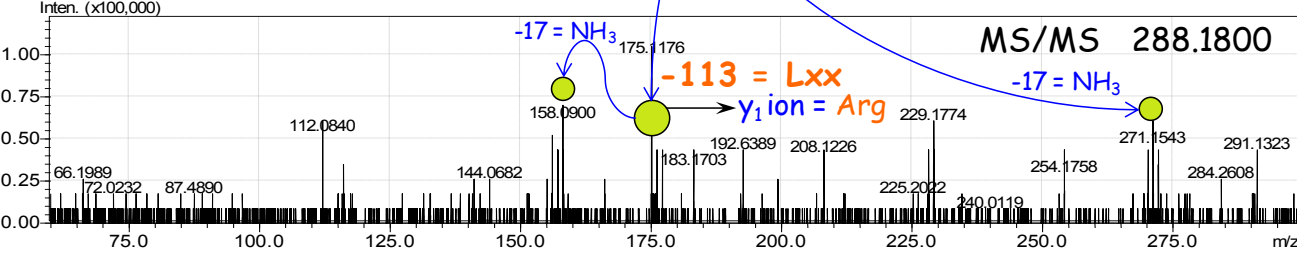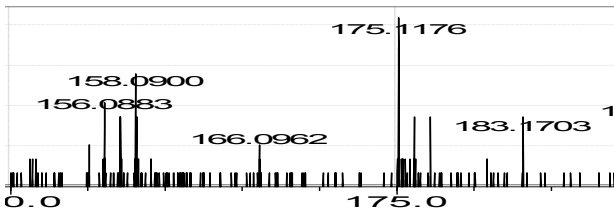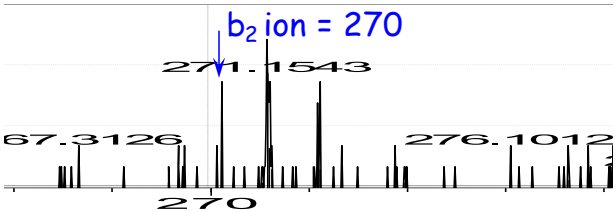

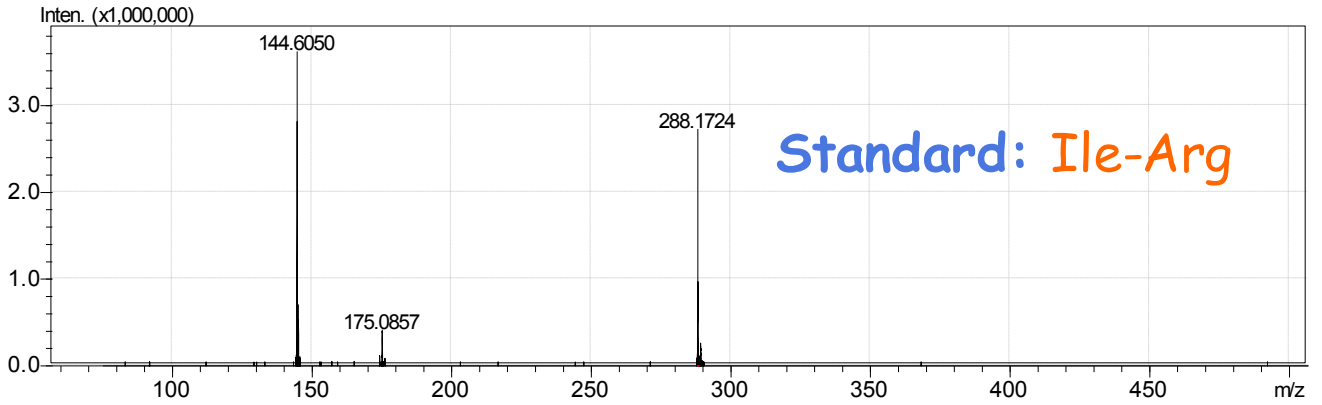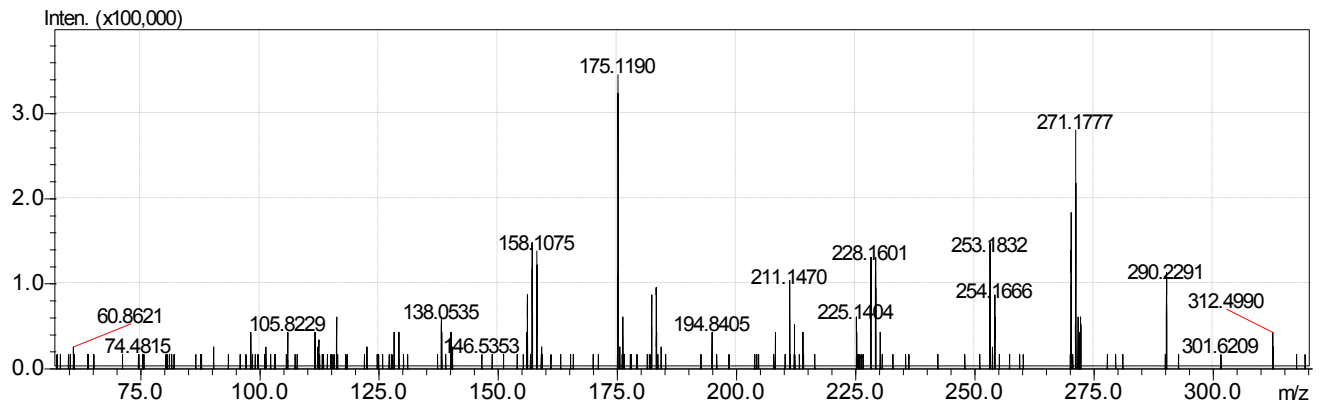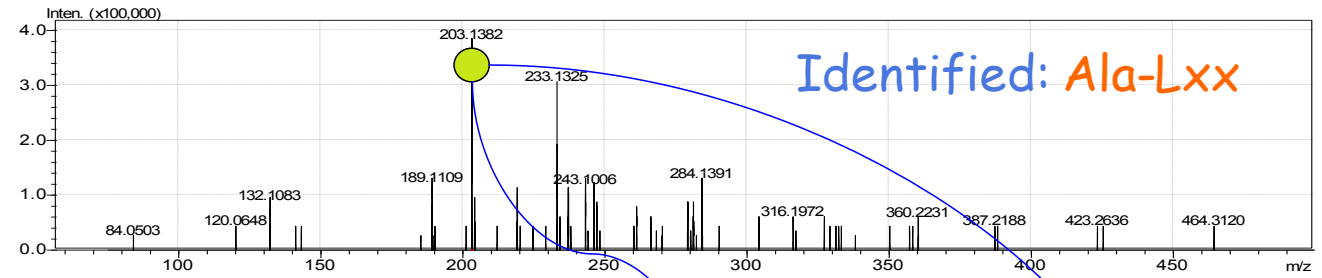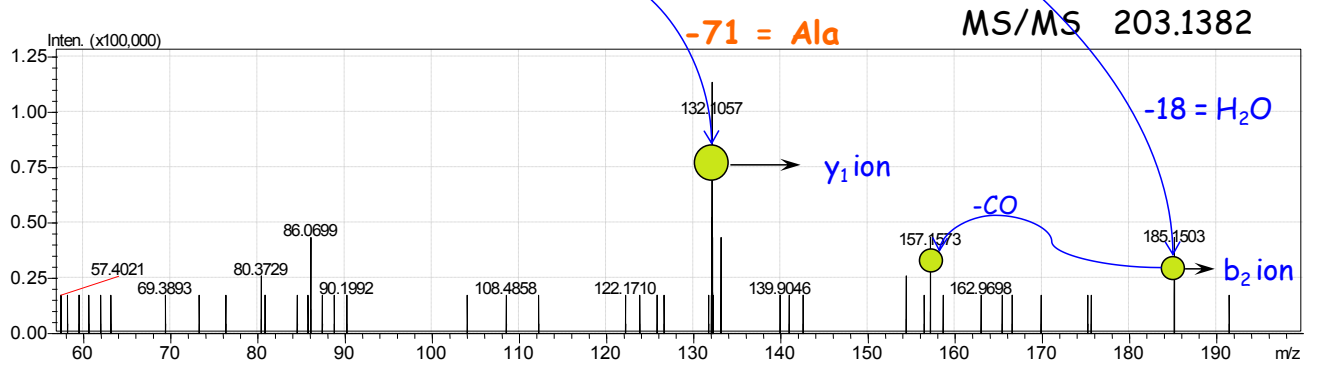

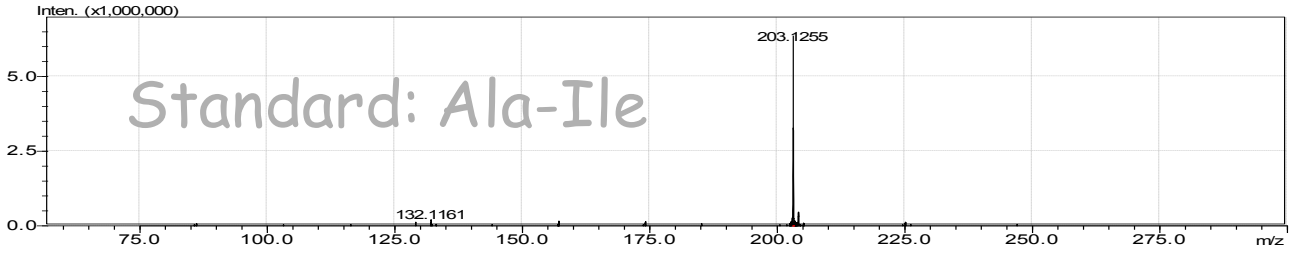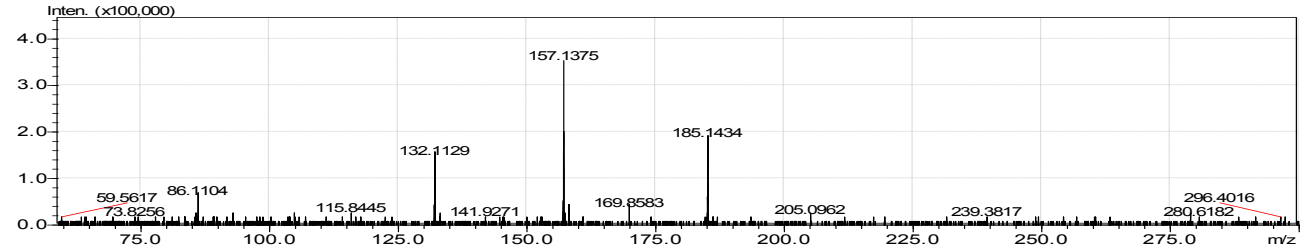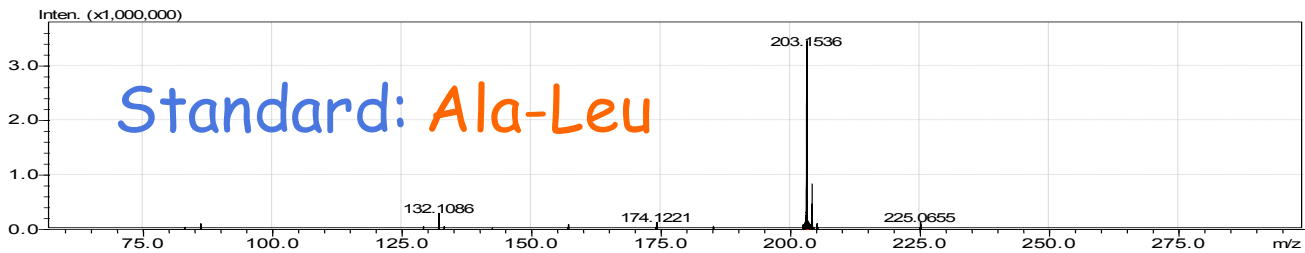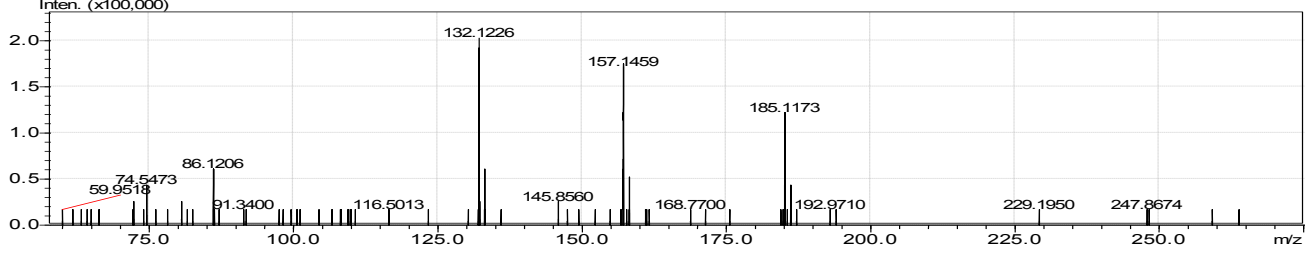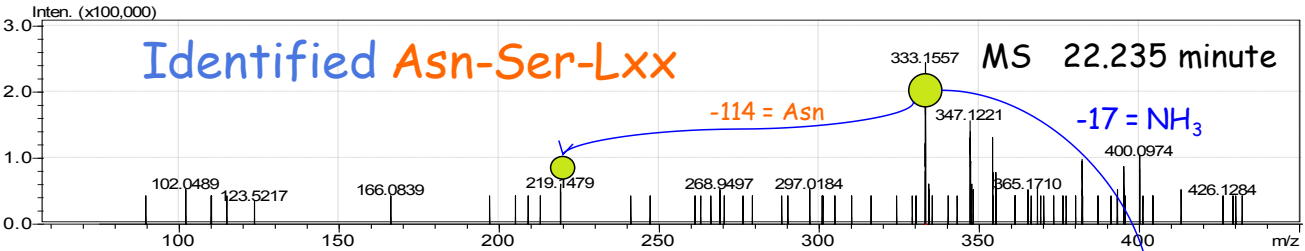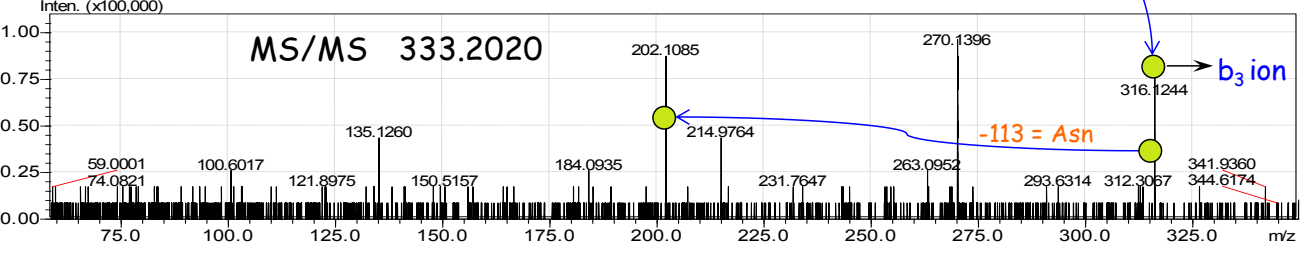

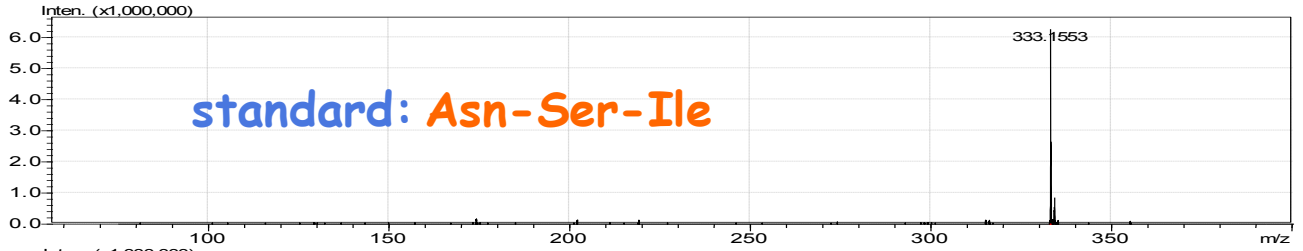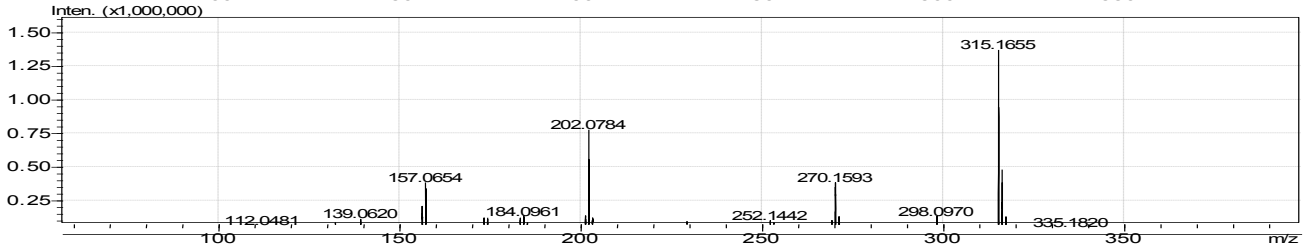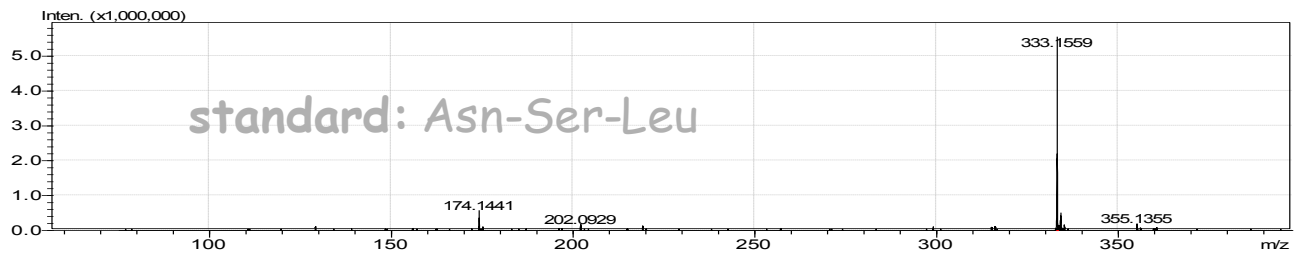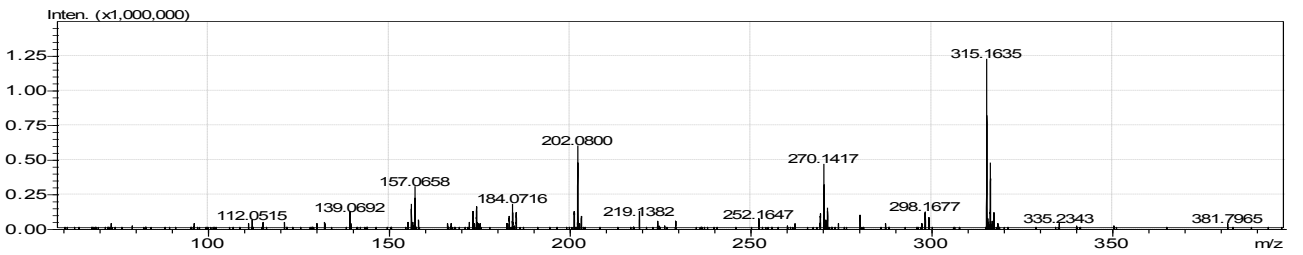

**Table S1.** Eleven fractions and their ACE inhibition rates.

| No. | Samples                       | Code  | Sample Final Concentration (100 µg/mL) |       |       |              |      |
|-----|-------------------------------|-------|----------------------------------------|-------|-------|--------------|------|
|     |                               |       | ACE Inhibition Rate (%)                |       |       | Mean         | Std. |
| 1   | Hot water extract             | HWR   | 43.33                                  | 42.12 | 38.04 | 41.16        | 0.87 |
| 2   | Auto-digested Reishi          | ADR   | 66.10                                  | 67.79 | 67.91 | 67.27        | 1.01 |
|     | <b>time (min)-amount (mg)</b> |       |                                        |       |       |              |      |
| 1   | 5–13 ( <b>162.9</b> )         | ADR1  | 21.04                                  | 22.50 | 22.94 | 22.16        | 1.00 |
| 2   | 13–17.5 ( <b>48.7</b> )       | ADR2  | 70.14                                  | 72.05 | 70.59 | 70.93        | 1.00 |
| 3   | 17.5–18.5 ( <b>4.7</b> )      | ADR3  | 74.29                                  | 74.51 | 75.41 | 74.74        | 0.59 |
| 4   | 18.5–22 ( <b>14.4</b> )       | ADR4  | 76.31                                  | 76.98 | 77.20 | 76.83        | 0.47 |
| 5   | 22–29.5 ( <b>29.9</b> )       | ADR5  | 88.42                                  | 89.87 | 90.66 | <b>89.65</b> | 1.14 |
| 6   | 29.5–31.5 ( <b>6.45</b> )     | ADR6  | 77.54                                  | 78.33 | 78.89 | 78.25        | 0.68 |
| 7   | 31.5–33.5 ( <b>3.21</b> )     | ADR7  | 83.48                                  | 83.93 | 84.16 | 83.86        | 0.34 |
| 8   | 33.5–35 ( <b>1.8</b> )        | ADR8  | 86.29                                  | 86.73 | 87.18 | 86.73        | 0.45 |
| 9   | 35–37.5 ( <b>2.7</b> )        | ADR9  | 86.51                                  | 88.30 | 87.07 | 87.29        | 0.92 |
| 10  | 37.5–39 ( <b>1.2</b> )        | ADR10 | 86.85                                  | 86.73 | 87.07 | 86.88        | 0.17 |
| 11  | 39–60 ( <b>18.8</b> )         | ADR11 | 80.23                                  | 80.90 | 79.67 | 80.27        | 0.62 |

**Table S2.** Sub-fractions and their ACE inhibition rates.

| No. | Time (min)–Amount (mg) | Code   | Sample Final Concentration (100 µg/mL) |       |       |       |      |
|-----|------------------------|--------|----------------------------------------|-------|-------|-------|------|
|     |                        |        | ACE Inhibition Rate (%)                |       |       | Mean  | Std. |
| 1   | 6–22.5 (3.48)          | ADR5-1 | 85.41                                  | 83.11 | 83.77 | 84.10 | 1.18 |
| 2   | 22.5–24 (2.63)         | ADR5-2 | 66.94                                  | 67.52 | 69.40 | 67.95 | 1.29 |
| 3   | 24–34.2 (2.48)         | ADR5-3 | 91.16                                  | 91.16 | 92.80 | 91.71 | 0.95 |
| 4   | 34.2–35.6 (0.61)       | ADR5-4 | 86.64                                  | 86.32 | 88.70 | 87.22 | 1.29 |
| 5   | 35.6–41.5 (4.39)       | ADR5-5 | 80.49                                  | 81.64 | 81.39 | 81.17 | 0.61 |
| 6   | 41.5–44.5 (1.67)       | ADR5-6 | 81.55                                  | 80.41 | 79.91 | 80.62 | 0.84 |
| 7   | 44.5–65 (5.68)         | ADR5-7 | 88.78                                  | 88.45 | 89.60 | 88.94 | 0.59 |
